# Supplementary material
Source: HighWire-hosted journal article supplement (https://www.annfammed.org/highwire/filestream/8144/field_highwire_adjunct_files/0/tagit-tool.pdf)
Supplement: tagit-tool.pdf [file tagit-tool.pdf]

Online Supplementary Material

Koopman RJ, Mainous AG III, Everett CJ, Carter RE. Tool to assess likelihood of fasting glucose impairment (TAG-IT). *Ann Fam Med*. 2008;6(6):555-561.

<http://www.annfammed.org/cgi/content/full/6/6/555/DC1>

| Tool to Assess Likelihood of<br>Fasting Glucose Impairment (TAG-IT)                                                                                                                                                                                                                                                     |       |
|-------------------------------------------------------------------------------------------------------------------------------------------------------------------------------------------------------------------------------------------------------------------------------------------------------------------------|-------|
| Characteristic                                                                                                                                                                                                                                                                                                          | Score |
| Age, years                                                                                                                                                                                                                                                                                                              |       |
| 20-27                                                                                                                                                                                                                                                                                                                   | 0     |
| 28-35                                                                                                                                                                                                                                                                                                                   | 1     |
| 36-44                                                                                                                                                                                                                                                                                                                   | 2     |
| 45-64                                                                                                                                                                                                                                                                                                                   | 4     |
| Sex                                                                                                                                                                                                                                                                                                                     |       |
| Male                                                                                                                                                                                                                                                                                                                    | 3     |
| Female                                                                                                                                                                                                                                                                                                                  | 0     |
| Body mass index (kg/m <sup>2</sup> )                                                                                                                                                                                                                                                                                    |       |
| < 25                                                                                                                                                                                                                                                                                                                    | 0     |
| 25-29.9                                                                                                                                                                                                                                                                                                                 | 2     |
| ≥30                                                                                                                                                                                                                                                                                                                     | 3     |
| Family history of diabetes                                                                                                                                                                                                                                                                                              |       |
| No                                                                                                                                                                                                                                                                                                                      | 0     |
| Yes                                                                                                                                                                                                                                                                                                                     | 1     |
| Heart rate (beats per minute)                                                                                                                                                                                                                                                                                           |       |
| < 60                                                                                                                                                                                                                                                                                                                    | 0     |
| 60-69                                                                                                                                                                                                                                                                                                                   | 0     |
| 70-79                                                                                                                                                                                                                                                                                                                   | 1     |
| 80-89                                                                                                                                                                                                                                                                                                                   | 2     |
| 90-99                                                                                                                                                                                                                                                                                                                   | 2     |
| ≥100                                                                                                                                                                                                                                                                                                                    | 4     |
| Hypertension                                                                                                                                                                                                                                                                                                            |       |
| No                                                                                                                                                                                                                                                                                                                      | 0     |
| Yes                                                                                                                                                                                                                                                                                                                     | 1     |
| <b>Total score:</b>                                                                                                                                                                                                                                                                                                     |       |
| Note: Details of the development and validation of this tool, including sensitivities and specificities for different total scores, were published in the article cited above. For further inquiries, contact Richelle Koopman, MD, at <a href="mailto:koopmanr@health.missouri.edu">koopmanr@health.missouri.edu</a> . |       |
